# Supplementary material
Source: Springer Nature journal article supplement (https://www.springermedizin.de/resource/supplementary/13229_2013_87_MOESM4_ESM.pdf/9676130)

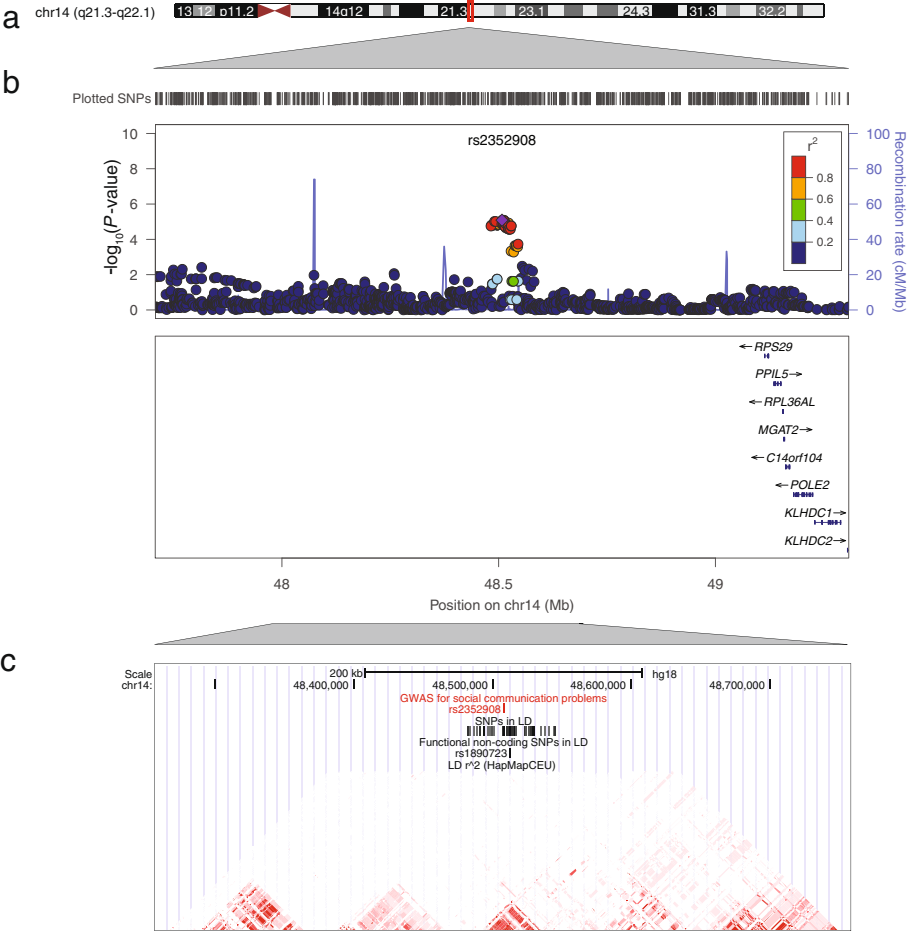

Supplement: MOESM4 [file 9676130]
